# Supplementary material
Source: PubMed Central journal article supplement (PMC2633530)
Supplement: 0812578106_0812578106SI.pdf [file 0812578106_0812578106SI.pdf]

# Supporting Information

Kim and Haber 10.1073/pnas.0812578106

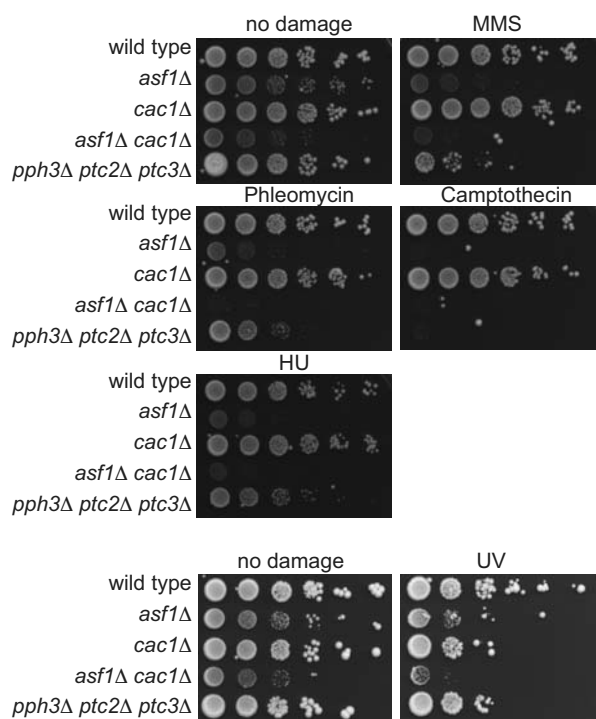

**Fig. S1.** DNA damage sensitivities of *asf1Δ*, *cac1Δ*, and *asf1Δ cac1Δ* cells. Wild-type, *asf1Δ*, *cac1Δ*, *asf1Δ cac1Δ*, and *pph3Δ ptc2Δ ptc3Δ* cells were grown in YEP/Dextrose medium to the exponential phase. The cells were serially diluted in 1:10-fold and then spotted onto YEP/Dextrose plus 0.005% methyl methane sulfonate (MMS), 0.1  $\mu\text{g}/\text{mL}$  of phleomycin, 1  $\mu\text{g}/\text{mL}$  of camptothecin, or 50 mM hydroxyurea (HU). To induce UV damage, serially diluted cells were spotted onto YEP/Dextrose plate and then irradiated with  $3\text{J}/\text{m}^2$  of UV. The pictures were taken 3 days after spotting; *pph3Δ ptc2Δ ptc3Δ* cells were used as a control showing DNA damage sensitivity.

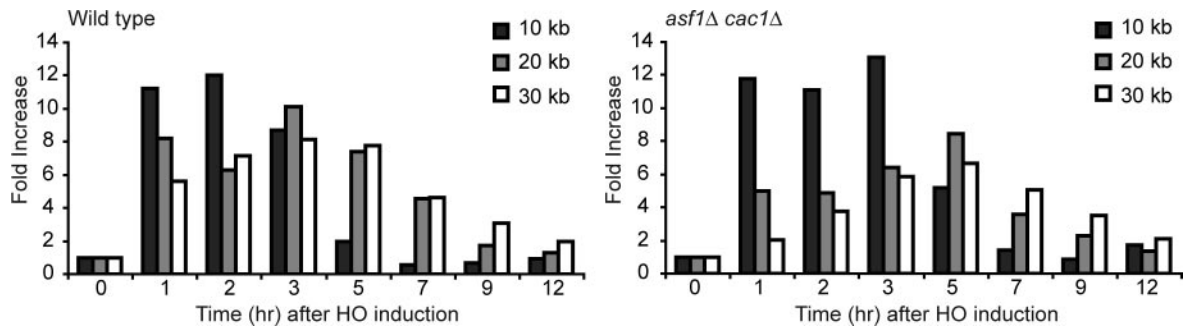

**Fig. S2.** Appearance and disappearance of  $\gamma$ -H2AX is not effected by the absence of both Asf1 and Cac1.  $\gamma$ -H2AX ChIP values at 10 kb (black bars), 20 kb (gray bars), or 30 kb (white bars) to the right of the DSB at *MAT* in wild-type cells were measured several time points (1, 2, 3, 5, 7, 9, and 12 hrs) after HO induction and normalized with the value prior to HO induction (0 hr).

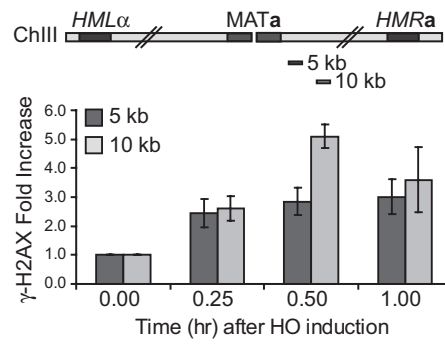

**Fig. S3.**  $\gamma$ -H2AX occurs around MAT locus during normal mating type switching.  $\gamma$ -H2AX ChIP values at 5 kb (black bars) and 10 kb (gray bars) to the right of the DSB at *MAT* in wild-type cells containing both *HML* and *HMR*, where an HO-induced DSB is repaired by intrachromosomal recombination, were measured different time points (15, 30, and 60 mins) after HO induction and normalized with the value prior to HO induction (0 min).

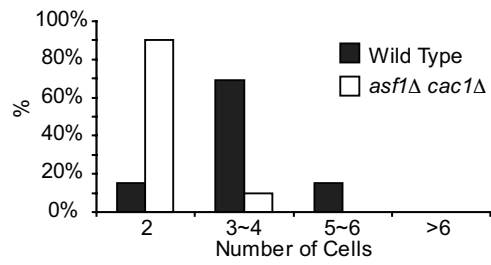

**Fig. S4.** The *asf1Δ cac1Δ* cells grow twice as slow as wild-type cells. Cells containing the mutated HO cut site (inc) were synchronized to G1 by growth to saturation and unbudded cells were spread onto galactose plates. The number of buds or cells was counted at 12 h after spreading (HO induction).

**Table S1. PCR primers to analyze recombination and histone H2A phosphorylation**

| Sense primer | Sequence                  | Antisense primer | Sequence                 | Usage                                                            |
|--------------|---------------------------|------------------|--------------------------|------------------------------------------------------------------|
| MAT7         | CCTGGTTTTGGTTTTGTAGAGTGG  | MATD p1          | CCGCATGGGCAGTTTACCT      | Probe for the Southern analysis in Fig. 1                        |
| YCR043C p1   | CCAAGGAACTAATGATCTAAGCACA | YCR043C p2       | GGCGAAAACAATGGCACTCT     | ChIP in Fig. S4; 5 kb away                                       |
| IMG1 p1      | TGGATCATGGACAAGGTCCTAC    | IMG1 p2          | GGCGAAAACAATGGCACTCT     | ChIP in Fig. 3 and Figs. S3 and S4; 10 kb away                   |
| PWP2 p1      | GACACACTTTACTTTGGCTTGTT   | PWP2 p2          | GACTTCAAAGACTTAAGCGCA    | ChIP in Fig. 3 and Fig. S4; 20 kb away                           |
| RAD18 p1     | TGTCATCGTTGGGACTGTCA      | RAD18 p2         | GAAACATAACCATCCATCCTTTCC | ChIP in Fig. 3 and Fig. S4; 30 kb away                           |
| CEN8 p1      | TGACAAAACCTCCCTTAGTGC     | CEN8 p2          | CTCCAACAATTACACATCCACA   | ChIP in Fig. 3 and Figs. S2–S4; reference for ChIP normalization |
